# Supplementary material
Source: Royal Society of Chemistry journal article supplement (doi:10.1039/d6cp00512h)

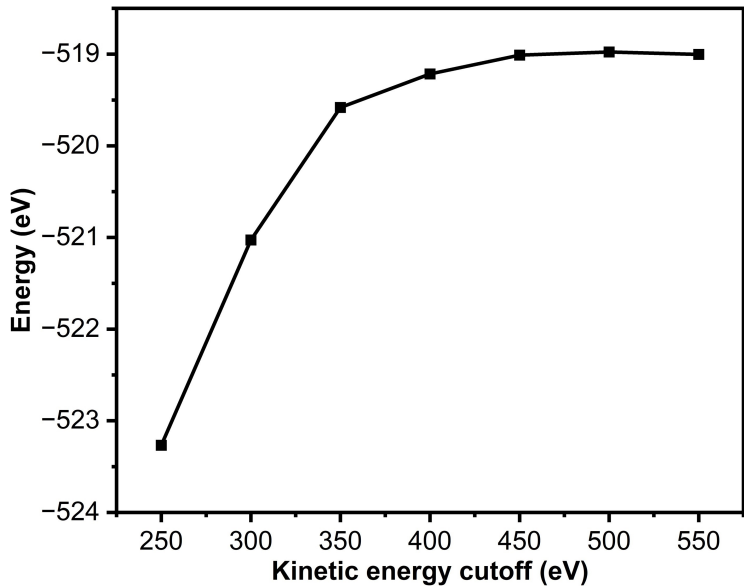

Supplement: d6cp00512h2.pdf [file d6cp00512h2.pdf]

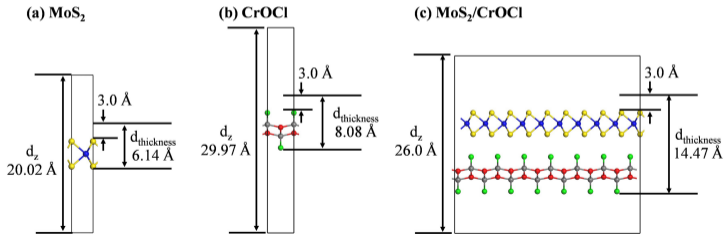

Supplement: d6cp00512h3.pdf [file d6cp00512h3.pdf]

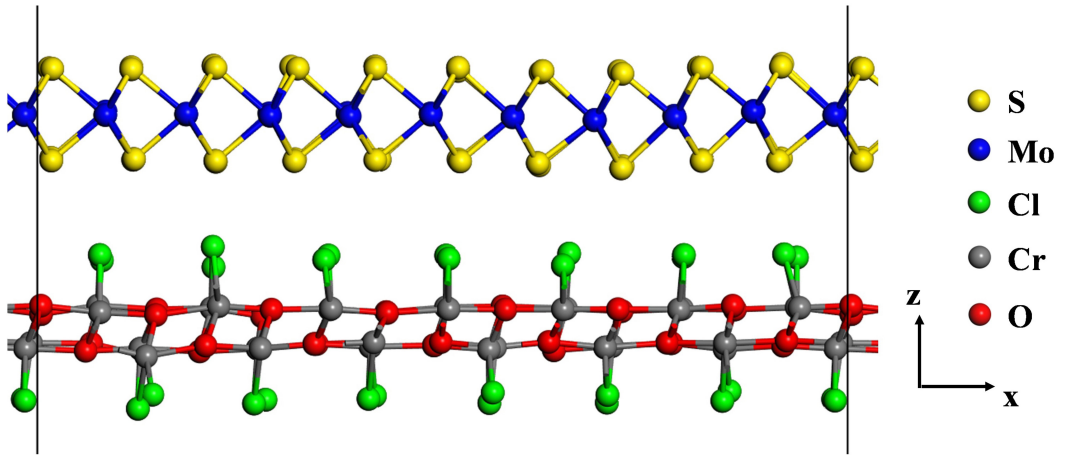

Supplement: d6cp00512h4.pdf [file d6cp00512h4.pdf]

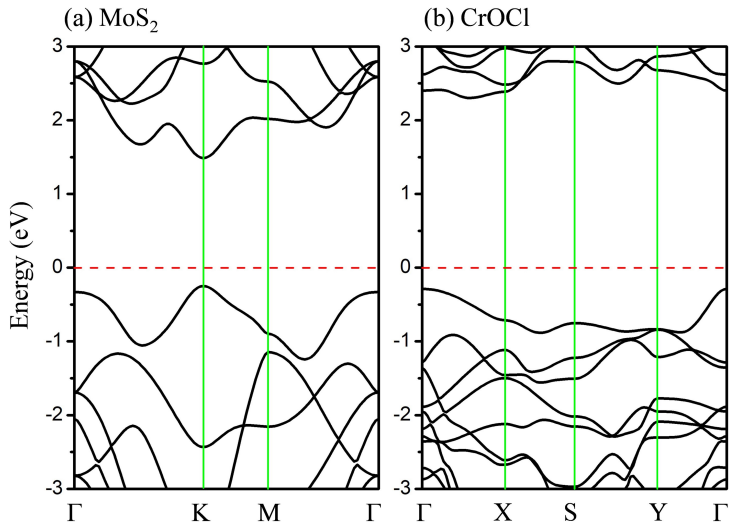

Supplement: d6cp00512h5.pdf [file d6cp00512h5.pdf]

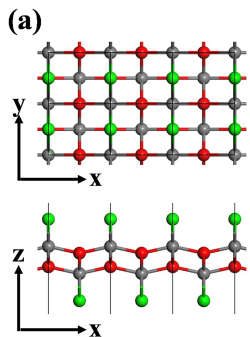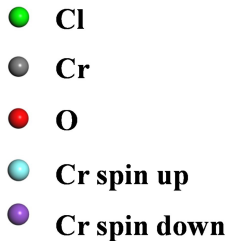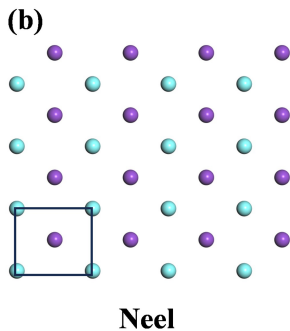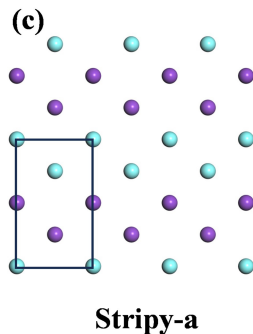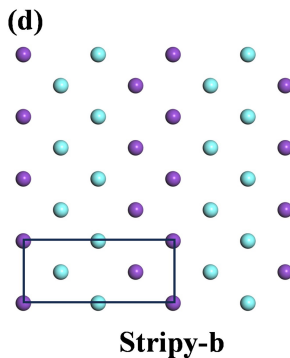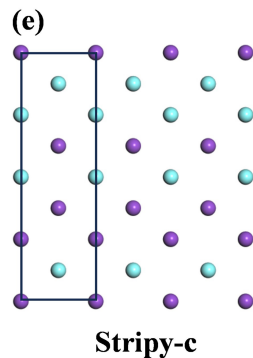

Supplement: d6cp00512h6.pdf [file d6cp00512h6.pdf]

**(a) CrOCl, U = 2 eV**

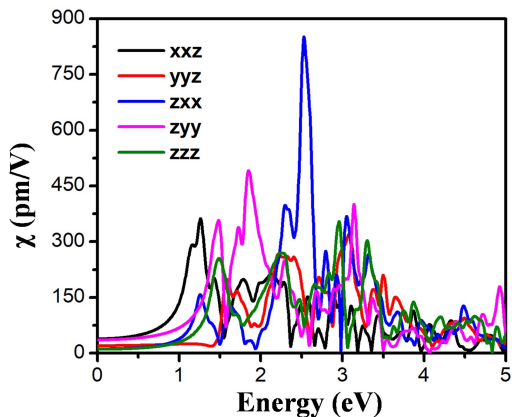

**(b) CrOCl, U = 4 eV**

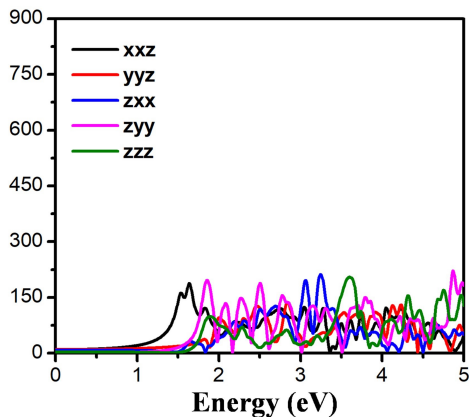

**(c) MoS<sub>2</sub>/CrOCl, U = 2 eV**

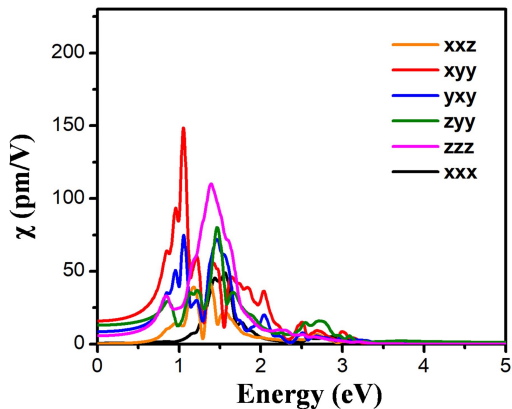

**(d) MoS<sub>2</sub>/CrOCl, U = 4 eV**

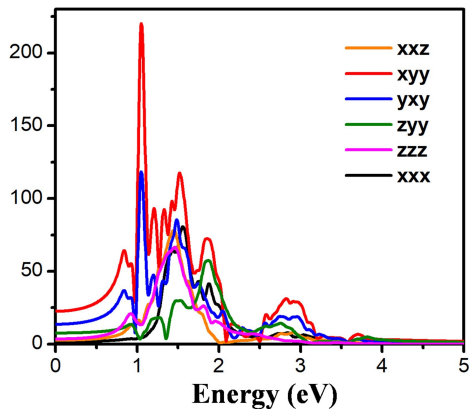

Supplement: d6cp00512h7.pdf [file d6cp00512h7.pdf]

(a) CrOCl,  $U = 2$  eV

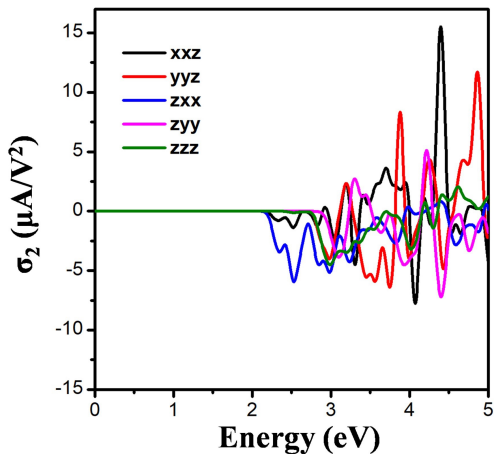

(b) CrOCl,  $U = 4$  eV

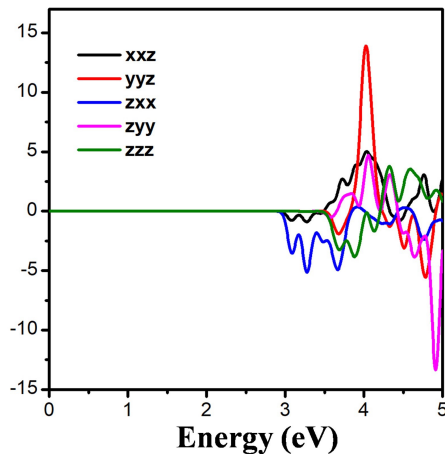

(c) MoS<sub>2</sub>/CrOCl,  $U = 2$  eV

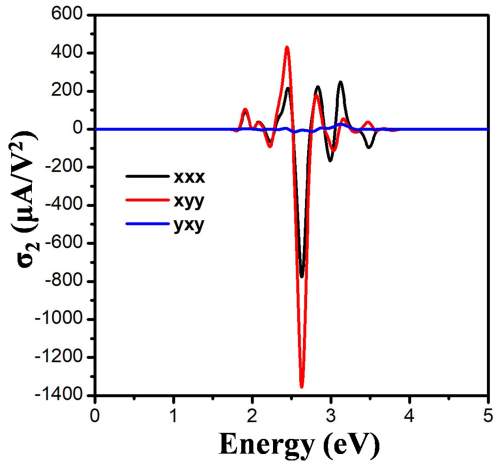

(d) MoS<sub>2</sub>/CrOCl,  $U = 4$  eV

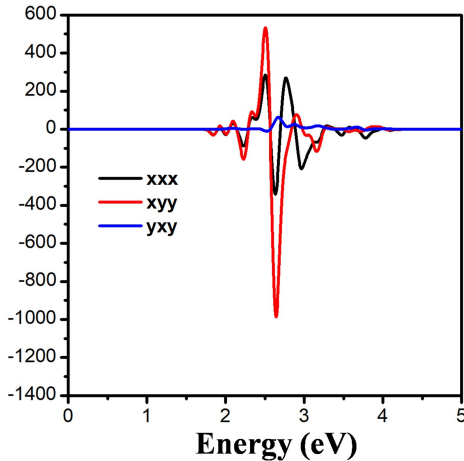

Supplement: d6cp00512h8.pdf [file d6cp00512h8.pdf]
